# Supplementary material for: Added Value of Water Column Spatiotemporal Monitoring to Assess Variability of Trace Metal Elements and Organotin Compounds in Mediterranean Harbours
Source: MDPI journal article supplement (doi:10.3390/jmse12030399), 2024-02-26
Supplement: s1 [file s1]

**Table S1.** Sediment granulometry and concentrations of major elements and terrigenous elements in sediments of Port Carnon (C) and Port Camargue (PC)

|                                  | Port           | PORT CAMARGUE |       |       |       |       |       |  | PORT CARNON |       |       |        |        |        |        |
|----------------------------------|----------------|---------------|-------|-------|-------|-------|-------|--|-------------|-------|-------|--------|--------|--------|--------|
|                                  | Station        | PC1           | PC2   | PC3   | PC4   | PC5   | PC6   |  | C1          | C2    | C3    | C4     | C5     | C6     | C7     |
| Granulometry (%)                 |                |               |       |       |       |       |       |  |             |       |       |        |        |        |        |
| Composition of the <2mm fraction | > 500 μm       | 2.7           | 1.1   | 18.2  | 2.5   | <1    | 1     |  | 10          |       |       |        | 10     |        |        |
|                                  | 500 to 250 μm  | 24.2          | 5.8   | 31    | 13.2  | 17.9  | 6.4   |  | 25          | 10    | 10    |        | 10     | 10     |        |
|                                  | 250 to 163 μm  | 26.3          | 10.3  | 18.6  | 15.8  | 20.9  | 9.3   |  | 25          | 10    | 10    | 10     | 15     | 25     | 10     |
|                                  | 163 to 63 μm   | 21.9          | 14.9  | 8.4   | 18.3  | 18.9  | 17.2  |  | 40          | 40    | 40    | 10     | 25     | 25     | 10     |
|                                  | <63 μm         | 24.9          | 68    | 23.8  | 50.2  | 41.4  | 66    |  |             | 40    | 40    | 65     | 25     | 40     | 65     |
|                                  | < 2 μm         | 1.5           | 3.6   | <1    | 1.4   | 1.2   | 1.6   |  |             |       |       | 15     | 15     |        | 15     |
| Major elements                   |                |               |       |       |       |       |       |  |             |       |       |        |        |        |        |
| Al                               | % dry sediment | 3.8           | 4.4   | 4.5   | 4     | 3.7   | 3.3   |  | 4.2         | 4.3   | 5.5   | 5.3    | 4.2    | 4.3    | 5.3    |
| Fe                               |                | 2.2           | 2.2   | 2.1   | 2.1   | 1.7   | 1.4   |  | 1.6         | 2     | 2.8   | 3.2    | 2.4    | 2.8    | 3.1    |
| Terrigenous elements             |                |               |       |       |       |       |       |  |             |       |       |        |        |        |        |
| Cs                               | mg/kg          | 5.52          | 4.78  | 4.46  | 4.7   | 4.34  | 4.37  |  | 3.55        | 5.62  | 8.9   | 10.56  | 8.15   | 9.11   | 9.92   |
| Li                               |                | 43.06         | 39.94 | 38.63 | 36.43 | 32.56 | 33.05 |  | 33.04       | 42.49 | 61.46 | 67.49  | 53.2   | 57.47  | 65.7   |
| Rb                               |                | 78.67         | 76.23 | 77.26 | 77.02 | 76.62 | 71.5  |  | 98.25       | 85.36 | 114.2 | 131.55 | 101.08 | 114.11 | 123.28 |

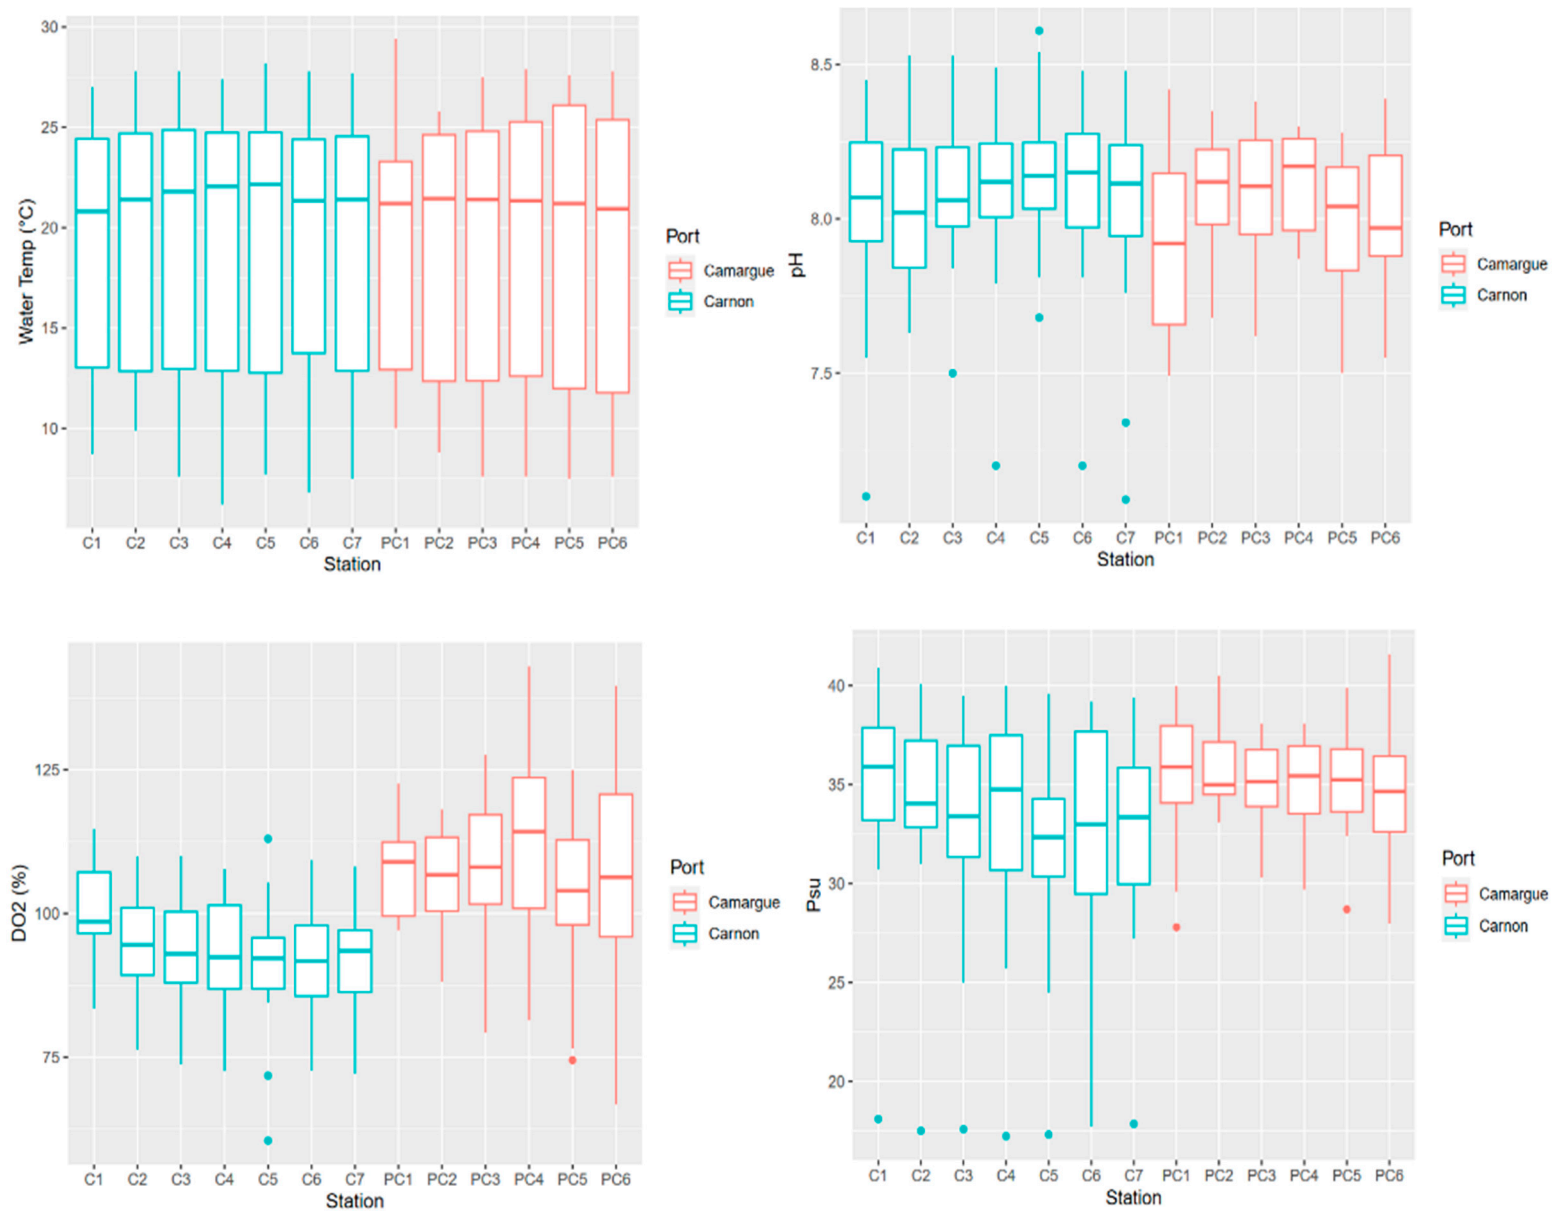

**Figure S1 :** Boxplots of physicochemical parameters in Port Carnon (C blue color) and Port Camargue (PC red color)

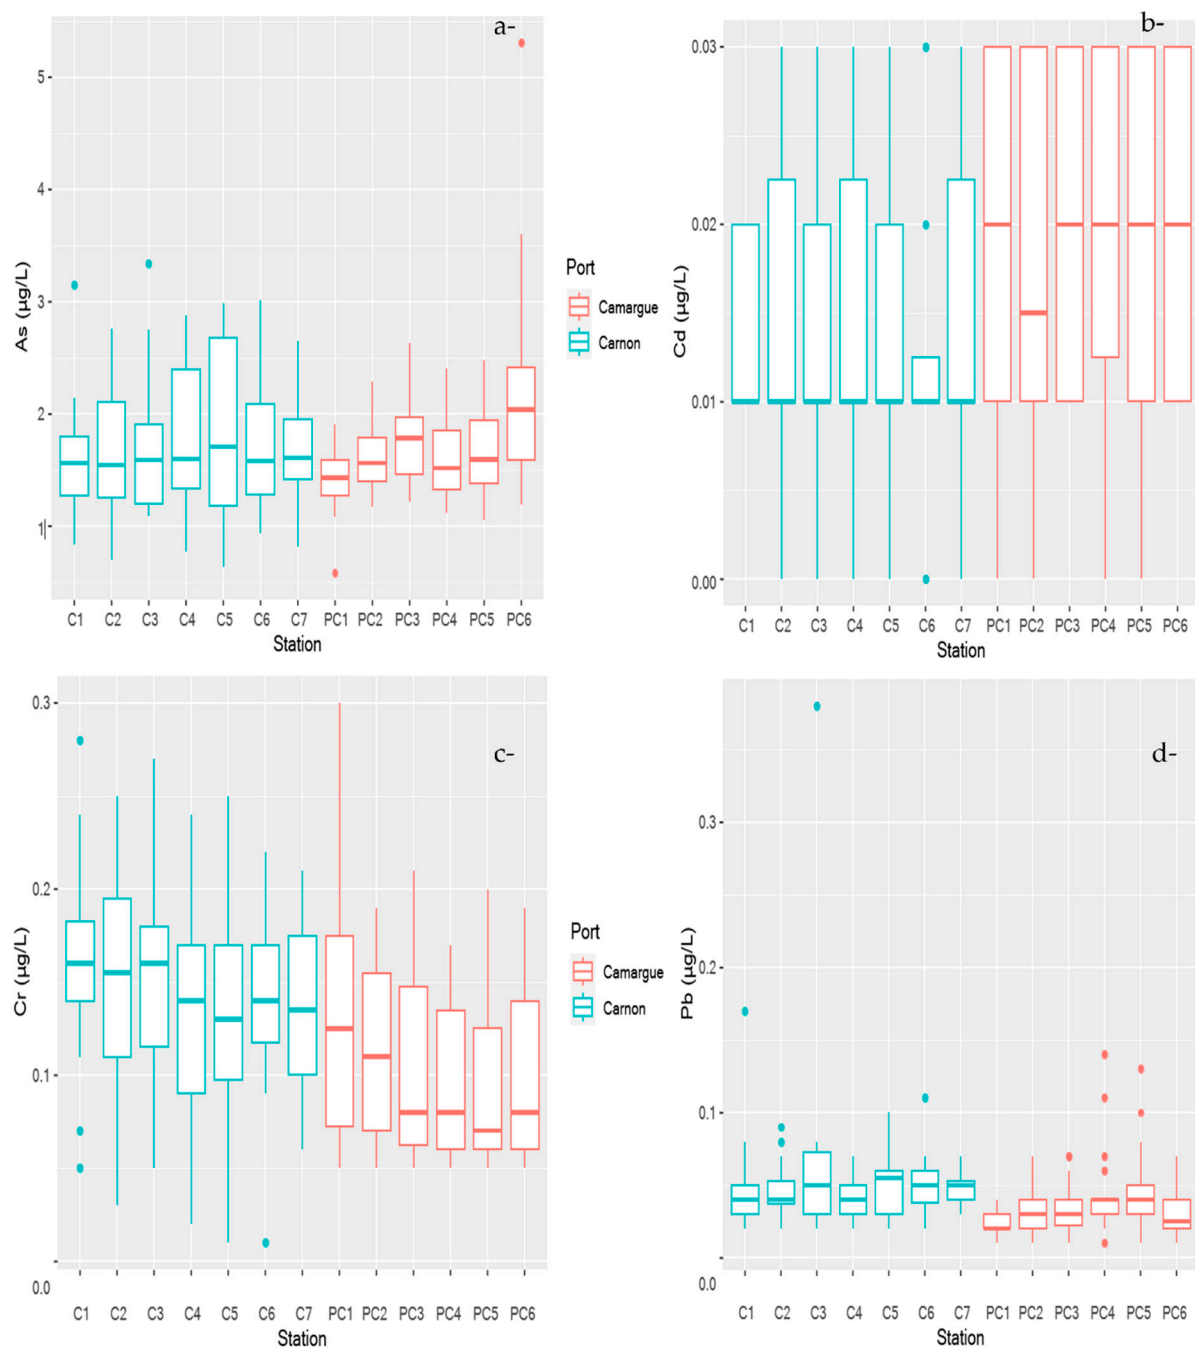

**Figure S2.** Box plots of TME concentrations As (a), Cd (b), Cr (c) and Pb (d) in samples of sea water of Port Carnon (C blue color) and Port Camargue (PC red color)
